# Supplementary material for: Mechanochemical Preparation and Self-Assembly of Protein:Dye Hybrids for White Luminescence
Source: PubMed Central journal article supplement (PMC8506585; doi:10.1021/acsapm.1c00382), 2021-09-03
Supplement: ap1c00382_si_001.pdf [file ap1c00382_si_001.pdf]

## Supporting Information

### Mechanochemical Preparation and Self-assembly of Protein: Dye Hybrids for White Luminescence

Yusheng Yuan, Niclas Solin\*

Department of Physics, Chemistry, and Biology, Biomolecular and Organic Electronics, Linköping University, 581 83 Linköping, Sweden.

E-mail: [niclas.solin@liu.se](mailto:niclas.solin@liu.se)

## 1. Schematic illustration of dyes@LPNF composite films.

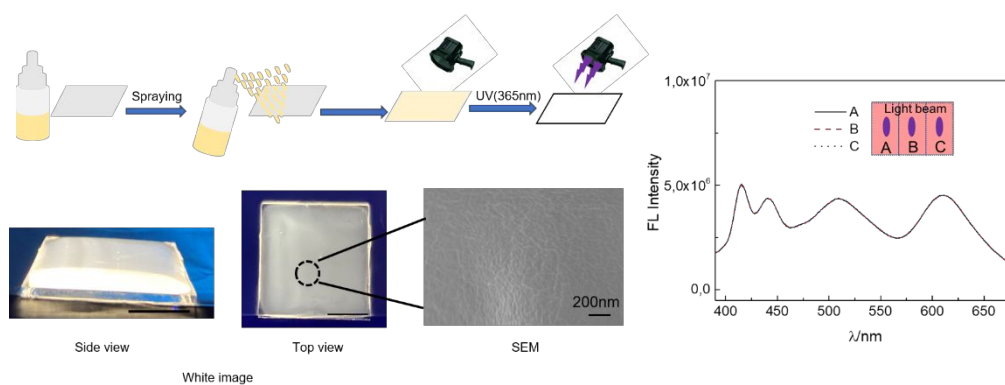

**Figure S1.** Schematic illustration of spray coating from the white matrix(top). Photographs of a spray coated white film from the side and the top, the scale bars represent 1 cm. The close-up is a SEM images of a spray coated white film. Left is the fluorescence spectrum of Film at different position.

## 2. Absorption spectra of F378@LPNF, F555@LPNF, NR@LPNF, F378@LPNF/F555@LPNF/NR@LPNF, and F378:F555:NR@LPNF.

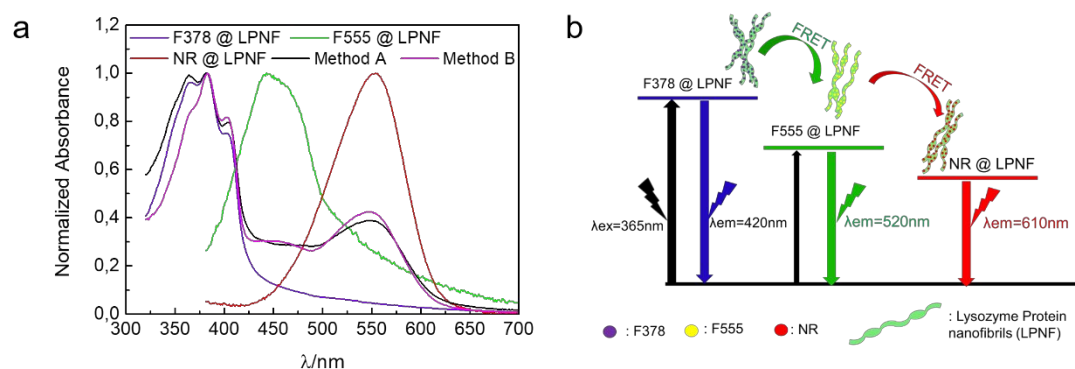

**Figure S2.** (a) Absorption spectrum of F378@LPNF (violet line), F555@LPNF (green line) and NR@LPNF (red line) separately, method A (F378@LPNF/ F555@LPNF / NR@LPNF, black line) method B (F378: F555: NR@LPNF, pink line). [F378]: 0.25  $\mu\text{g}\cdot\text{mL}^{-1}$ , [F555]: 0.25  $\mu\text{g}\cdot\text{mL}^{-1}$ , [NR]: 30  $\text{ng}\cdot\text{mL}^{-1}$ . (b) Schematic representation of FRET pathway in the matrix (F378→F555→NR). Excited states of F555 and NR could be populated by FRET and direct absorption.

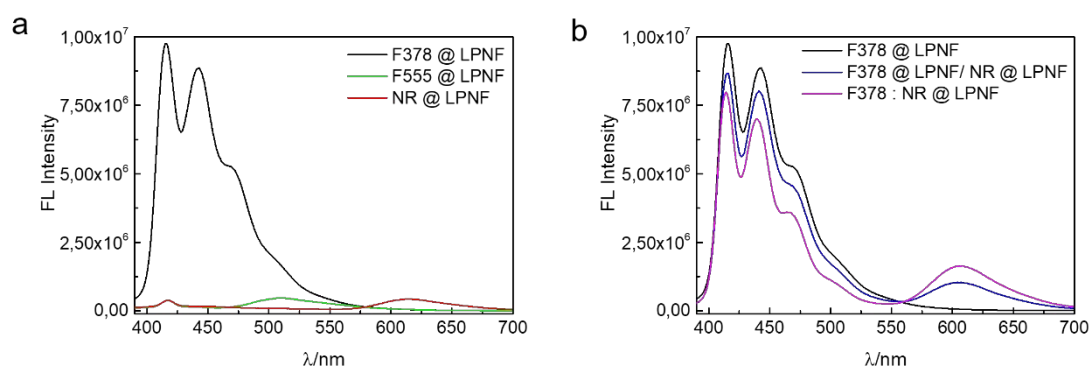

**Figure S3.** (a) LPNF functionalized with individual dyes excited at 365nm. (black line: F378@LPNF, green line: F555@LPNF, red line: NR@LPNF). (b) LPNF functionalized with F378 and NR dyes in different process excited at 365nm. black line: F378@LPNF, blue line: F378@LPNF/ NR@LPNF (Method A), pink line: F378:NR@LPNF (Method B).

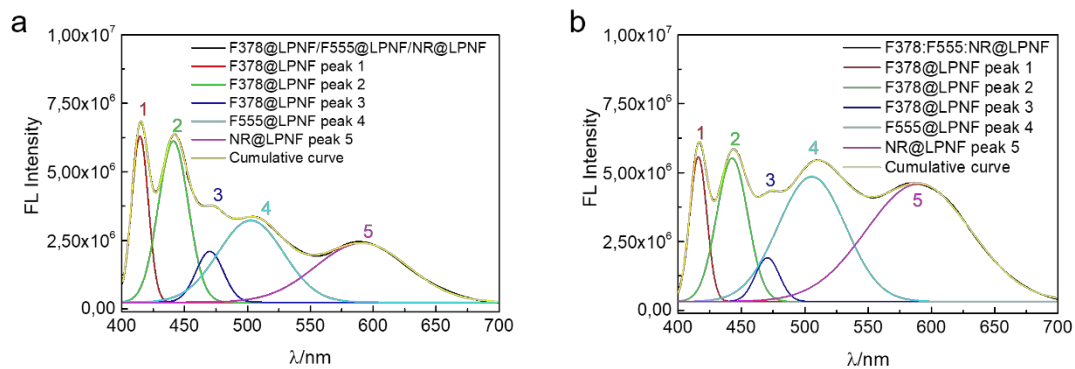

Figure S4. (a) deconvolution of fluorescence spectral data for a spectrum from a sample prepared by method A. (b) deconvolution of fluorescence spectral data for a spectrum from a sample prepared by method B.

### 3. Chromaticity Coordinates (Method B)

#### 3.1 CIE values of F378: F555@LPNF systems in solution state.

**Table S1.** CIE Values of F378: F555@LPNF in solution state. The CIE Coordinates (X=0.20 and Y=0.28) Representing the ratio chosen for further investigate (Marked).

| F378@HEWL<br>( $\mu\text{g}\cdot\text{mL}^{-1}$ ) | F555@HEWL<br>( $\mu\text{g}\cdot\text{mL}^{-1}$ ) | Chromaticity       |
|---------------------------------------------------|---------------------------------------------------|--------------------|
| 0.25                                              | 0.125                                             | (0.18,0.19)        |
| 0.25                                              | 0.25                                              | <b>(0.20,0.28)</b> |
| 0.25                                              | 0.375                                             | (0.21,0.31)        |
| 0.25                                              | 0.5                                               | (0.22,0.35)        |
| 0.25                                              | 0.625                                             | (0.23,0.38)        |
| 0.25                                              | 0.75                                              | (0.23,0.39)        |

**Table S2.** CIE Values of F555: NR@LPNF in solution state.

| F555@HEWL<br>( $\mu\text{g}\cdot\text{mL}^{-1}$ ) | NR@HEWL<br>( $\mu\text{g}\cdot\text{mL}^{-1}$ ) | Chromaticity |
|---------------------------------------------------|-------------------------------------------------|--------------|
| 0.25                                              | 0.125                                           | (0.33,0.46)  |
| 0.25                                              | 0.25                                            | (0.33,0.45)  |
| 0.25                                              | 0.375                                           | (0.33,0.44)  |
| 0.25                                              | 0.5                                             | (0.33,0.43)  |
| 0.25                                              | 0.625                                           | (0.34,0.40)  |
| 0.25                                              | 0.75                                            | (0.34,0.36)  |

**Table S3.** CIE Values of F378: F555: NR@LPNF in solution state. The CIE Coordinates (X=0.33 and Y=0.34) Representing the ratio for white emission (Marked).

| F378@HEWL<br>( $\mu\text{g}\cdot\text{mL}^{-1}$ ) | F555@HEWL<br>( $\mu\text{g}\cdot\text{mL}^{-1}$ ) | NR@HEWL<br>( $\text{ng}\cdot\text{mL}^{-1}$ ) | Chromaticity       |
|---------------------------------------------------|---------------------------------------------------|-----------------------------------------------|--------------------|
| 0.25                                              | 0.25                                              | 5                                             | (0.23,0.32)        |
| 0.25                                              | 0.25                                              | 10                                            | (0.26,0.31)        |
| 0.25                                              | 0.25                                              | 15                                            | (0.27,0.31)        |
| 0.25                                              | 0.25                                              | 20                                            | (0.29,0.30)        |
| 0.25                                              | 0.25                                              | 25                                            | (0.33,0.30)        |
| 0.25                                              | 0.25                                              | 30                                            | <b>(0.33,0.34)</b> |

## 4. Fluorescence lifetime measurements

Fluorescence decay profiles of individual dyes are monitored at its maximum emission wavelength upon excitation wavelength at 375nm, for the donor-acceptors are monitored at donor's maximum emission wavelength upon excitation wavelength at 375nm.

**Table S4.** Triple exponential fluorescence decay profiles of LPNF functionalized with dyes. F378@LPNF, F555@LPNF, NR@LPNF, Method A, Method B. [F378@LPNF]:  $0.25 \mu\text{g}\cdot\text{mL}^{-1}$ , [F555@LPNF]:  $0.25 \mu\text{g}\cdot\text{mL}^{-1}$ , [NR@LPNF]:  $30 \text{ ng}\cdot\text{mL}^{-1}$ .

| Samples                                    | $\tau_1$<br>(ns) | RW <sub>1</sub><br>[%] | $\tau_2$<br>(ns) | RW <sub>2</sub><br>[%] | $\tau_3$<br>(ns) | RW <sub>3</sub><br>[%] | $\tau$<br>(ns) | $\chi^2$ |
|--------------------------------------------|------------------|------------------------|------------------|------------------------|------------------|------------------------|----------------|----------|
| F378@LPNF (monitored at 420nm)             | 0.13             | 4.13                   | 0.75             | 78.62                  | 1.83             | 17.25                  | 0.91           | 1.15     |
| F555@LPNF (monitored at 520nm)             | 1.01             | 7.77                   | 4.93             | 43.08                  | 9.36             | 49.15                  | 6.8            | 1.21     |
| NR@LPNF (monitored at 610nm)               | 0.32             | 5.31                   | 1.02             | 35.55                  | 2.44             | 59.14                  | 1.82           | 1.12     |
| F378@LPNF/F555@LPNF (monitored at 420nm)   | 0.4              | 38.73                  | 0.52             | 57.11                  | 2.58             | 4.16                   | 0.56           | 1.27     |
| F378: F555@LPNF (monitored at 420nm)       | 0.16             | 17.08                  | 0.40             | 73.41                  | 2.11             | 9.51                   | 0.52           | 1.21     |
| F378@LPNF/NR@LPNF (monitored at 420nm)     | 0.12             | 4.47                   | 0.65             | 74.45                  | 1.72             | 21.08                  | 0.85           | 1.33     |
| F378: NR@LPNF (monitored at 420nm)         | 0.47             | 13.69                  | 0.65             | 67.80                  | 1.82             | 18.51                  | 0.84           | 1.29     |
| F555@LPNF/NR@LPNF (monitored at 520nm)     | 1.31             | 14.72                  | 3.94             | 57.33                  | 7.78             | 27.95                  | 4.63           | 1.20     |
| F555: NR@LPNF (monitored at 520nm)         | 1.27             | 28.71                  | 3.96             | 57.01                  | 10.15            | 14.28                  | 4.07           | 1.11     |
| Method A Sol (monitored at 420nm)          | 0.07             | 2.47                   | 0.60             | 76.69                  | 1.79             | 20.84                  | 0.83           | 1.22     |
| Method B Sol (monitored at 420nm)          | 0.09             | 4.49                   | 0.59             | 79.24                  | 1.84             | 16.27                  | 0.77           | 1.33     |
| White gel (Method B, monitored at 420nm)   | 0.09             | 4.82                   | 0.53             | 81.98                  | 1.96             | 13.20                  | 0.70           | 1.32     |
| White film (Method B, (monitored at 420nm) | 0.11             | 8.05                   | 0.49             | 76.27                  | 1.83             | 15.68                  | 0.67           | 1.31     |

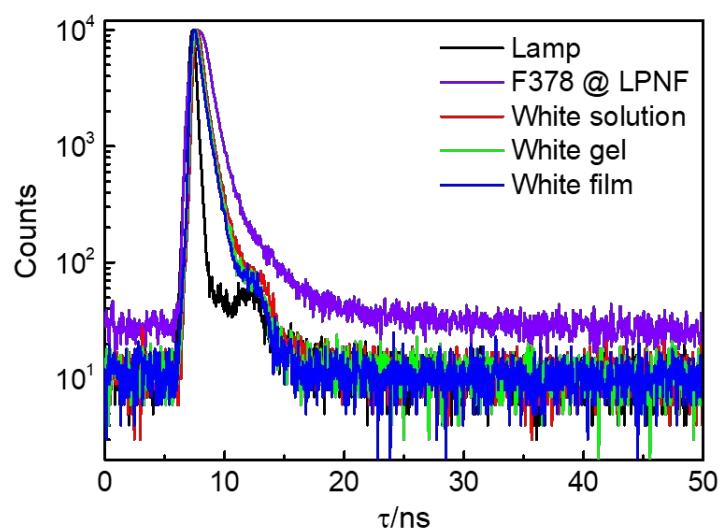

**Figure S5.** Fluorescence decay profiles of LPNF functionalized with dyes in different states prepared by method B. F378@LPNF (violet line, monitor at 420nm), Method B solution (red line, monitor at 420nm), Method B white gel (green line, monitor at 420nm), Method B sprayed film (blue line, monitor at 420nm). [F378@LPNF]:  $0.25 \mu\text{g}\cdot\text{mL}^{-1}$ , [F555@LPNF]:  $0.25 \mu\text{g}\cdot\text{mL}^{-1}$ , [NR@LPNF]:  $30 \text{ ng}\cdot\text{mL}^{-1}$ .

## 5. Quantum yield of LPNF composites

The fluorescence quantum yield ( $\Phi$ ) of individual F378@LPNF, F555@LPNF solution samples were estimated by comparison with coumarin 153 in ethanol as standard ( $\Phi = 0.53$ )<sup>1</sup>, fluorescein in 0.1M NaOH as standard ( $\Phi = 0.92$ ) for NR@LPNF sample<sup>2</sup>. The quantum yield was calculated using the following equation<sup>3</sup>:

$$\Phi_{F,x} = \Phi_{F,s} \cdot \frac{Grad_x \eta_x^2}{Grad_s \eta_s^2}$$

Where, subscript  $x$  denotes unknown sample and subscript  $s$  refers to standard. *Grad* is gradient from the plot of integrated fluorescence intensity vs absorbance, absorbance is at excitation wavelength and,  $\eta$  is the refractive index of the solvent used (0.1M NaOH is 1.33, Ethanol is 1.36, for PNF samples 1.42 is used).

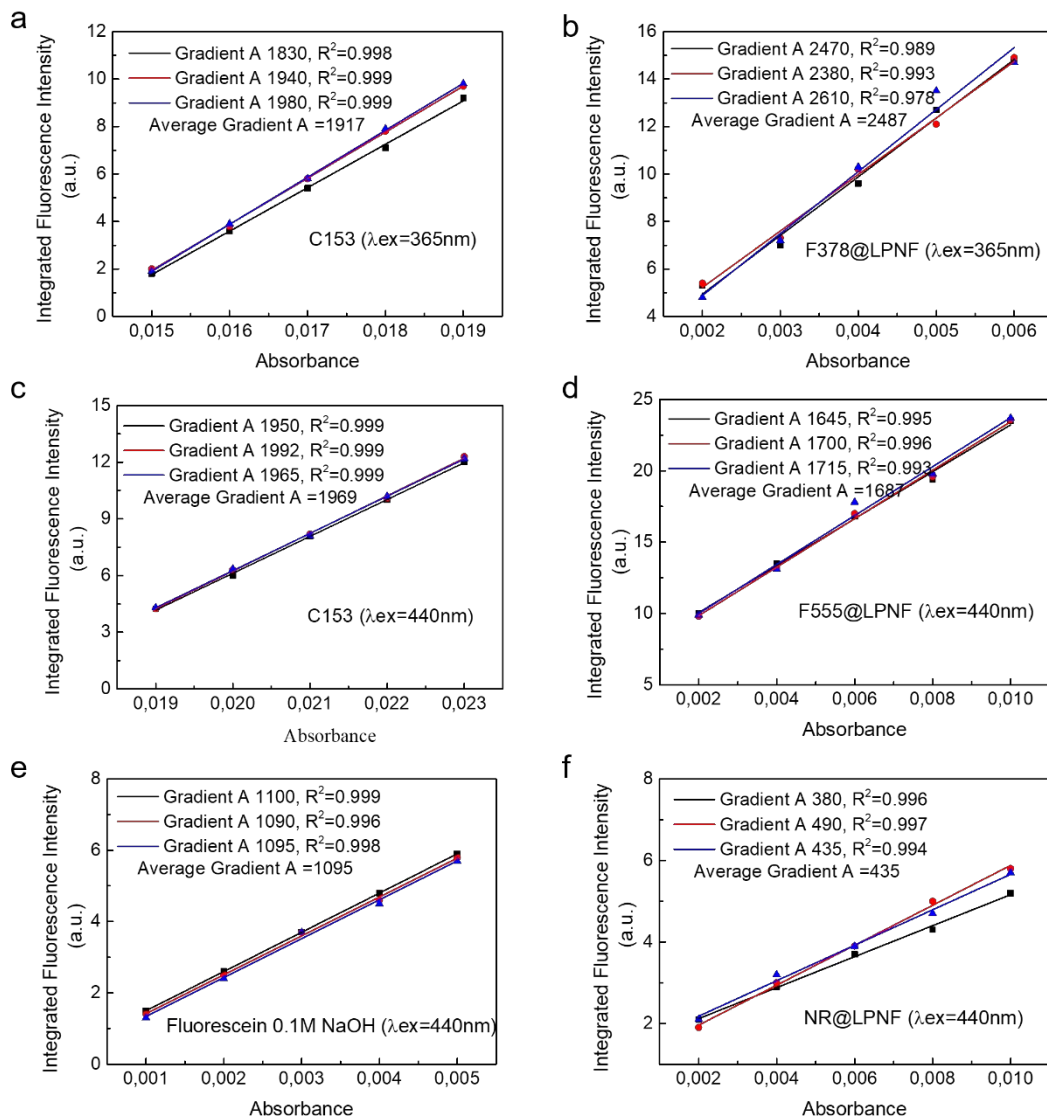

**Figure S6.** Linear plot of integrated fluorescence intensity vs absorbance. (a) C153 excited at 365nm. (b) F378@LPNF excited at 365nm. (c) C153 excited at 440nm. (d) F555@LPNF excited at 440nm. (e) Fluorescein excited at 365nm. (f) NR@LPNF excited at 440nm.

## 6. Spectral overlap of donors and acceptors



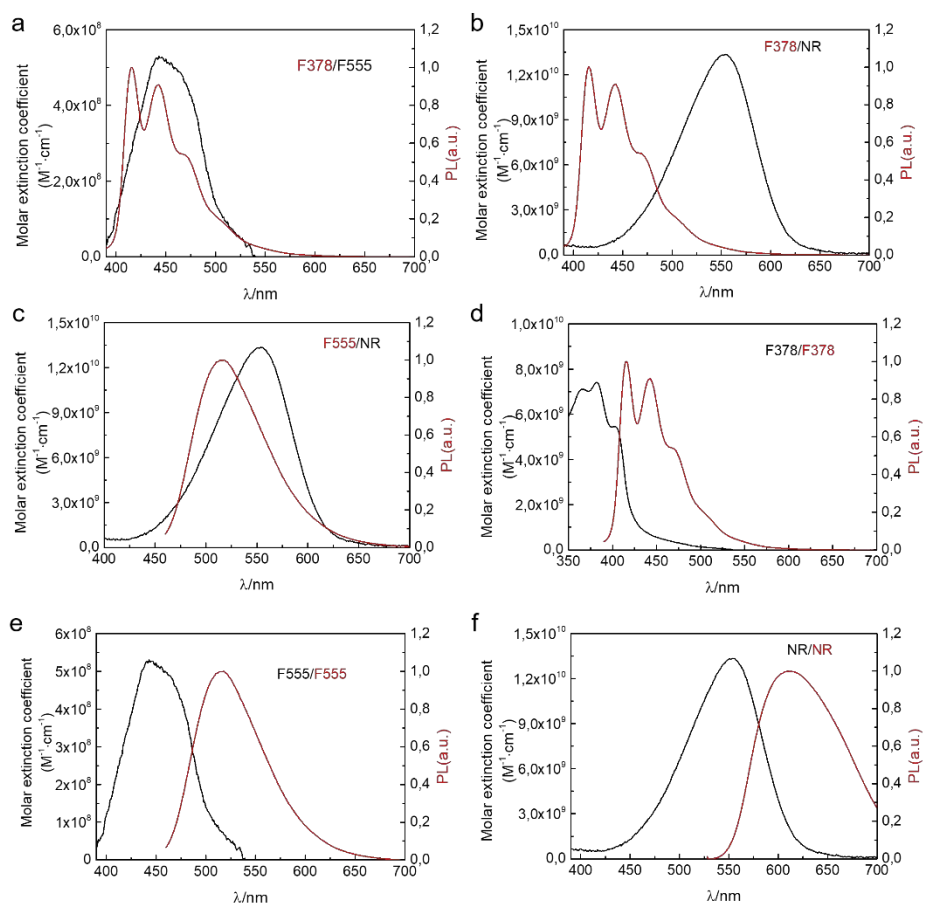

**Figure S7.** The spectral overlap between the absorption of acceptor (molar extinction coefficient,  $M^{-1}\cdot cm^{-1}$ ) and the emission of donor for (a) F378/F555, (b) F378/NR, (c) F555/NR. (d) F378/F378, (e) F555/F555, (f) NR/NR. In all cases the the spectra are taken from the dye@PNF samples.

## 7. Temperature effect on the PL of spraying film and gel

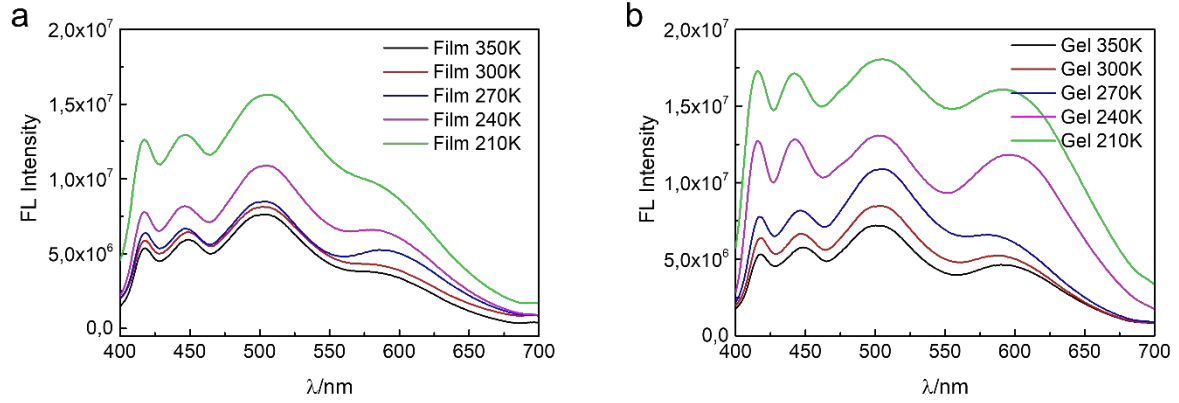

Figure S8. Temperature-dependent PL spectra of spraying film (a) and gel (b) measured at different temperatures from 210 to 350 K.

## 8. Commercial Blue LED coating with spraying film and gel

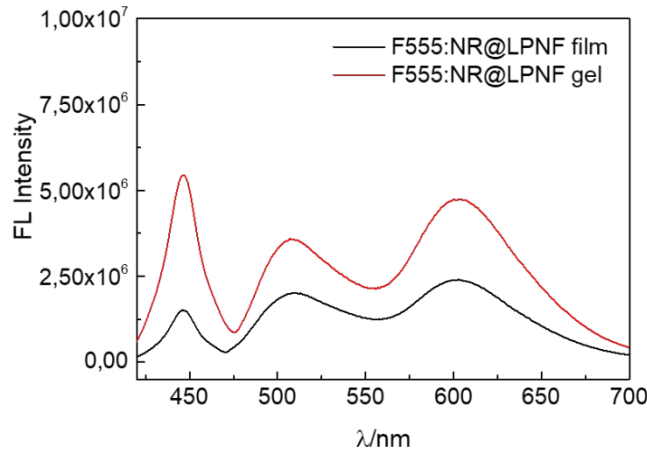

Figure S9. F555:NR@LPNF spraying film coating on the blue LED (440nm) at a distance of 2 cm. F555:NR@LPNF gel coating on the blue LED.

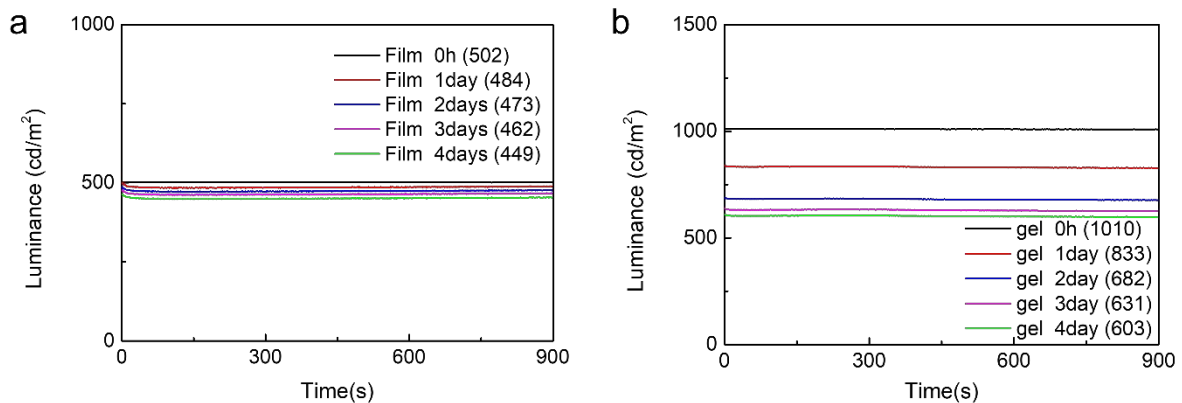

Figure S10. Luminance of white film (a) coating above the UV LED (365nm) at a distance of 2cm and white gel (b) coating on UV LED (365nm).

Table S5. Luminous efficacy and CCT of spraying film and gel on coating LED.

| Time (day) | Film ( $\text{lm}\cdot\text{W}^{-1}$ ) | Gel ( $\text{lm}\cdot\text{W}^{-1}$ ) | Film CCT(K) | Gel CCT(K) |
|------------|----------------------------------------|---------------------------------------|-------------|------------|
| 0          | 28.1                                   | 47.5                                  | 6111        | 7646       |
| 1          | 27.1                                   | 39.2                                  | 6221        | 8434       |
| 2          | 26.5                                   | 32.1                                  | 6467        | 8710       |
| 3          | 25.9                                   | 29.7                                  | 6544        | 8940       |
| 4          | 25.1                                   | 28.3                                  | 6782        | 9006       |

## 9. Stability test of spraying film and gel

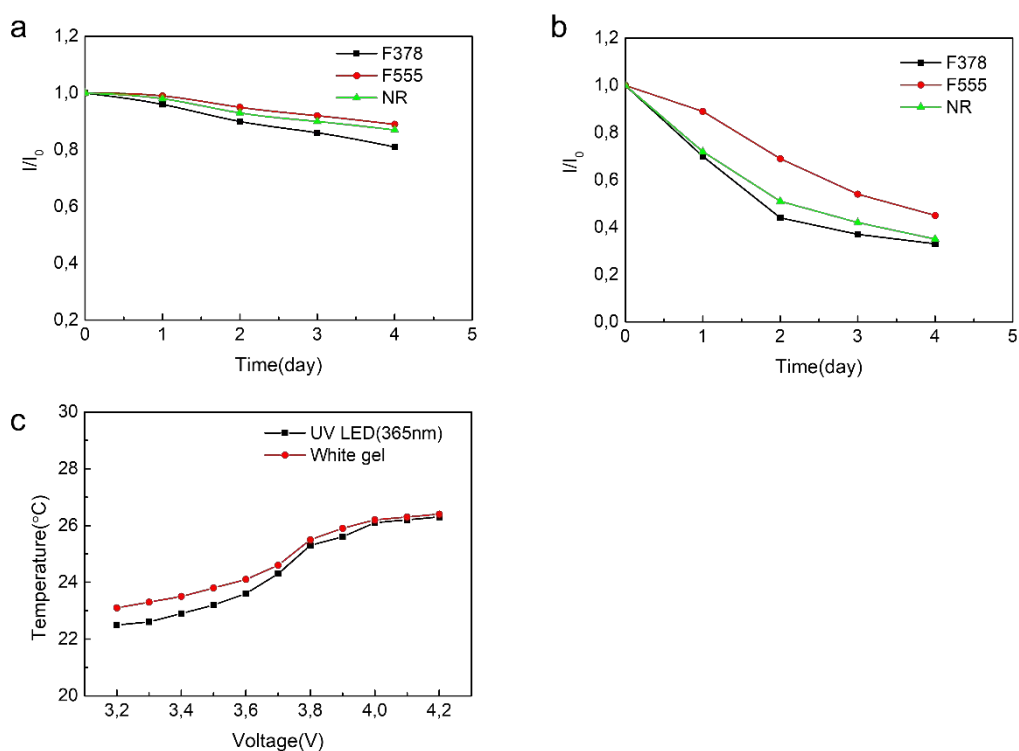

**Figure S11.** (a-b) Relative changes in intensity of emission spectra as a function of time during LED operation for (a) spray coated films and (b) gels. The emission intensity of each dye at a given time was divided by its emission intensity at 0 hours. F378 (black line, relative intensity at 420 nm); F555 (red line, relative intensity at 520 nm); NR (green line, relative intensity at 610 nm). (c) Changes in the temperature vs applied voltage for a commercial 365 nm LED (black) and the same LED with a white gel coating (red).

**Table S6.** Comparison with reported white light emitting devices on coating LED.

| Materials                   | LED structure                                                   | Driving mode | CIE       | CRI  | CCT (K)   | Stability                                                                                    | Conditions                                                                   |
|-----------------------------|-----------------------------------------------------------------|--------------|-----------|------|-----------|----------------------------------------------------------------------------------------------|------------------------------------------------------------------------------|
| Cellulose <sup>4</sup>      | 365LED/CNC /PGM/RG dyes                                         | 3V           | -         | 84.4 | 3543-4150 | 3% CRI decrease, 24 hours.                                                                   | Composite was deposited on a UV-LED                                          |
| Protein-Au NCs <sup>5</sup> | 380 LED blue/red AuNCs (prepared/measured in oxygen conditions) | 30 mA        | 0.31/0.29 | -    | 6840      | 50% efficiency decrease, 10 hours                                                            | Composite on a LED                                                           |
| BSA <sup>6</sup>            | 365 LED /BSA/C460/F/ROX/EDC dyes                                | -            | 0.28/0.31 | -    | 5300      | 50% luminance decrease, 106 hours                                                            | Biophosphors were placed at a fixed height (2.5mm) on LEDs in ambient air    |
| Polyurethane <sup>7</sup>   | 460 LED/pm546/pm605/SRh101 dyes/MOFs                            | 50 mA        | 0.47/0.41 | 85   | 2642      | pm546: 70% luminance decrease, 24 hours<br>pm605 and SRh101: 30% luminance decrease, 24hours | The phosphor was on the LED (phosphor fixed by highly transparent silicone). |
| This work                   | 365 LED/RGB dyes                                                | 3.5V         | 0.32/0.33 | 68   | 6015      | 10.7% luminous efficacy decrease, 96 hours                                                   | Film on the LED (Remote)                                                     |
| This work                   | 365 LED/RGB dyes                                                | 3.5V         | 0.29/0.34 | 78   | 7629      | 40.4% luminous efficacy decrease, 96 hours                                                   | Gel on the LED                                                               |

## References

- (1) Würth, C.; Grabolle, M.; Pauli, J.; pieles, M.; Resch-Genger, U.; Relative and absolute determination of fluorescence quantum yields of transparent samples. *Nature protocols* **2013**, *8*, 1535-1550.
- (2) Magde, D.; Wong, R.; Seybold, P. G.; Fluorescence quantum yields and their relation to lifetimes of rhodamine 6G and fluorescein in nine solvents: Improved absolute standards for quantum yields. *Photochem. Photobio.* **2002**, *75*, 327-334.
- (3) Rurack, K.; Spieles, M.; Fluorescence quantum yields of a series of red and near-infrared dyes emitting at 600-1000 nm. *Anal. Chem.* **2011**, *83*, 1232-1242.
- (4) Gotta, J.; Shalom, T. B.; Aslanoglou, S.; Cifuentes-Rius, A.; Voelcker, N. H.; Elnathan, R.; Shoseyov, O.; Richter, S.; Stable White Light-Emitting Biocomposite Films. *Adv. Funct. Mater.* **2018**, *28*, 1706967.
- (5) Aires, A.; Fernández-Luna, V.; Fernández-Cestau, J.; Costa, R. D.; Cortajarena, A. L.; White-emitting Protein-Metal Nanocluster Phosphors for Highly Performing Biohybrid Light-Emitting Diodes. *Nano Lett.* **2020**, *20*, 2710-2716.
- (6) Benson, K.; Ghimire, A.; Pattammattel, A.; Kumar, C. V.; Protein Biophosphors: Biodegradable, Multifunctional, Protein-Based Hydrogel for White Emission, Sensing, and pH Detection. *Adv. Funct. Mater.* **2017**, *27*, 1702955.
- (7) Tang, Y., Cao, W., Yao, L., Cui, Y., Yu, Y., Qian, G., Polyurethane-coated luminescent dye@ MOF composites for highly-stable white LEDs. *J. Mater. Chem. C.* **2020**, *8*, 12308-12313.
